# Supplementary material
Source: PubMed Central journal article supplement (PMC3839093)
Supplement: NIHMS516726-supplement-02.pdf [file NIHMS516726-supplement-02.pdf]

# Phylogenetic tree of cytochromes b

(zoomable version of Figure 1 of the main text).

Bootstrap values and results of aLRT test (Anisimova *et al.*, 2006) are given for all branches (except some of the most terminal) and separated with the / sign

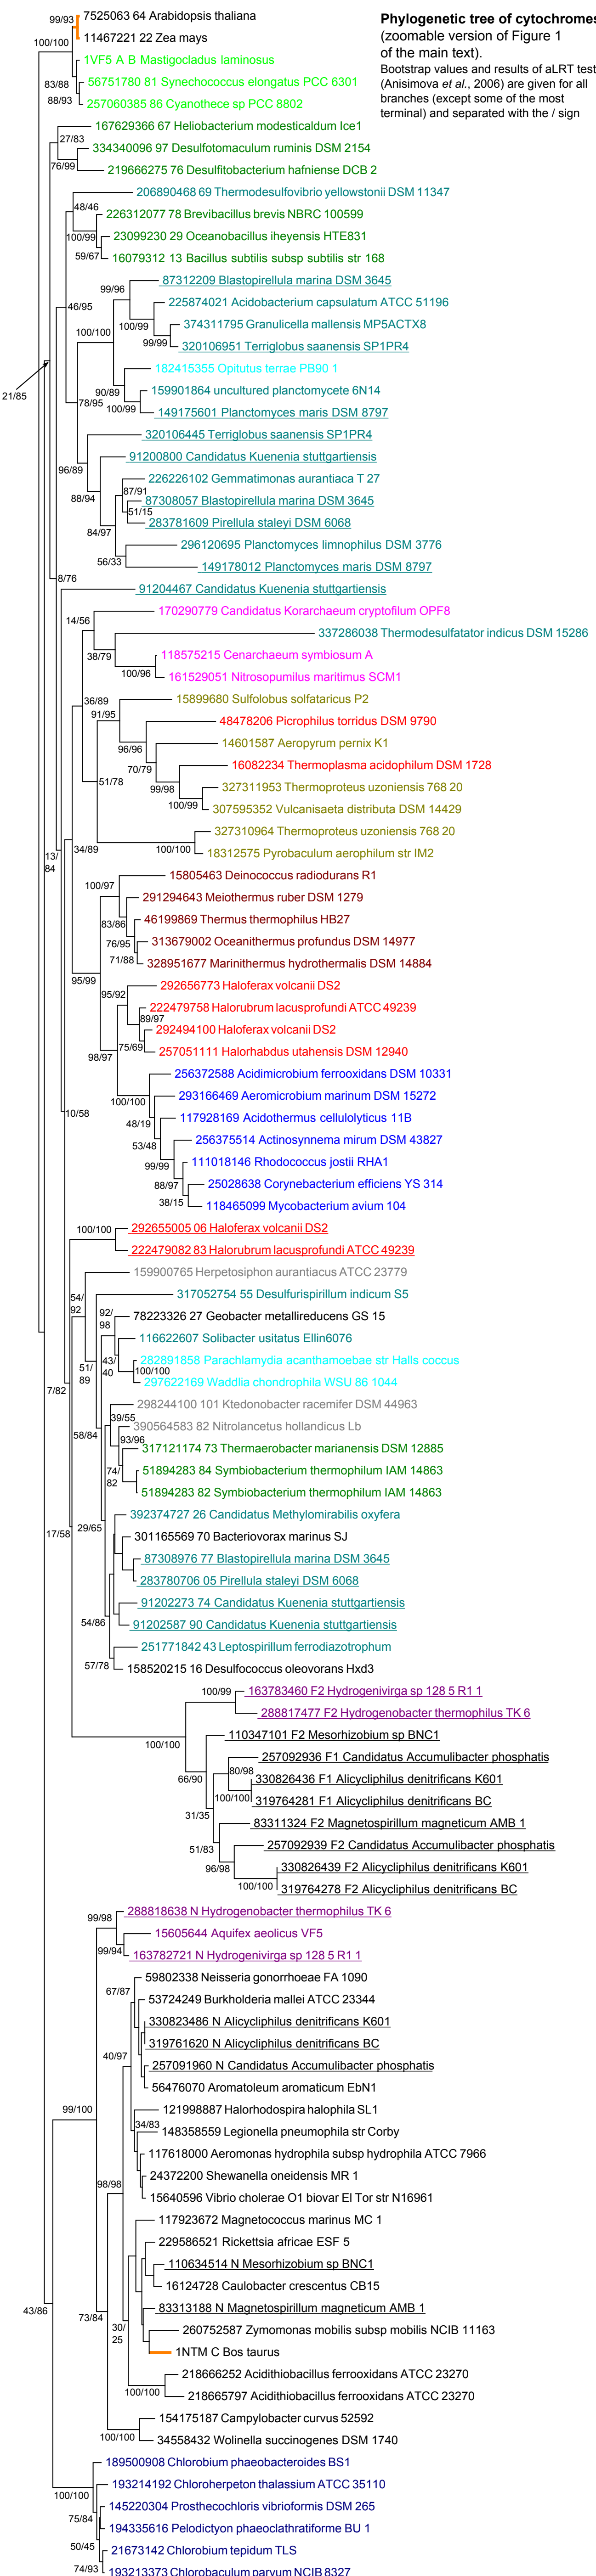

0.5
